# Supplementary material for: Diagnostic Accuracy of the Screening Instruments Used to Identify Postpartum Depression in the Primary Care Setting: Protocol for a Systematic Review and Meta-Analysis
Source: Research Square preprint supplement (doi:10.21203/rs.3.rs-309424/v1), 2021-03-18
Supplement: Supplementary file 1 [file 9592d5457f59cf8b2b91454c.docx]

**Additional file 3. Draft items for data extraction**

**Publication details:** year of publication, language, publication status

**Characteristics of study:** study design, methods, country, setting, sample size, number of centers (if applicable), source of funding

**Characteristics of population:** age, race/ethnicity, socioeconomic status (e.g., income, level of education), other risk factors for depression, information regarding respondent bias/representativeness of the included population, support status, partum status, geographical location

**Details about the exposure/intervention**: type of screening test performed, screening tool(s)/question(s) used, timing period and frequency of screening

**Details about comparator:** any additional services provided to comparator group (other index test)

**Outcomes of interest**: definitions, measurement methods, data, adjusted and unadjusted effect estimates

**Risk of bias items:** QUADAS-2
